# Supplementary material
Source: PubMed Central journal article supplement (PMC514478)

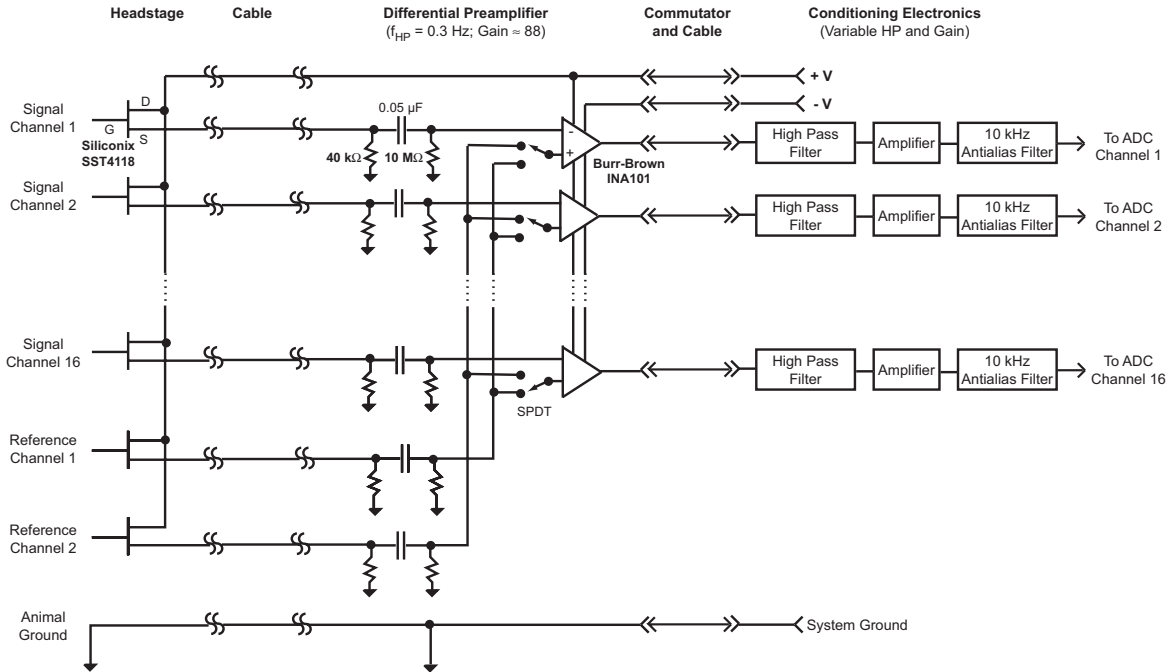

Supplement: pnas_101_33_12348__1.pdf [file pnas_101_33_12348__1.pdf]
